# Supplementary material for: Differences in the Selection Bottleneck between Modes of Sexual Transmission Influence the Genetic Composition of the HIV-1 Founder Virus
Source: PLoS Pathog. 2016 May 10;12(5):e1005619. doi: 10.1371/journal.ppat.1005619 (PMC4862634; doi:10.1371/journal.ppat.1005619)
Supplement: S1 Table — (XLSX) [file ppat.1005619.s008.xlsx]

## Sheet: S1 Table
Supplementary Table 1. Clinical description of cohort study subjects with acute or early HIV-1 infection.
Subject	Subtype	Risk Factor	Geographical Location	Year of sampling	Viral load RNA/ml	CD4 count cells/μl	Fiebig stage
119534	B	MSM	MA, USA	1998	750000	389	V
135466	B	MSM	MA, USA	2001	588278	395	II/III
136172	B	MSM	Germany	2009	433000	292	II/III
143200	B	MSM	MA, USA	2012	22300000	597	II/III
147984	B	MSM	Germany	2008	401000	549	II/III
154162	B	MSM	Germany	2008	2300000	429	II/III
159793	B	MSM	Germany	2009	5100000	241	II/III
172508	B	MSM	Germany	2009	4700000	192	II/III
176952	B	MSM	Germany	2008	2430	764	IV
231603	B	MSM	MA, USA	2012	276504	805	II/III
255524	B	MSM	Germany	2008	5700000	409	II/III
268977	B	MSM	MA, USA	2004	41000000	510	I
284160	B	MSM	MA, USA	1999	63700	399	I
290307	B	MSM	Germany	2010	1400000	459	II/III
293050	B	MSM	MA, USA	2008	1000001	554	II/III
296004	B	MSM	Germany	2008	1600000	272	II/III
320435	B	MSM	Germany	2010	6000000	377	II/III
328659	B	MSM	MA, USA	2002	5240000	307	II/III
328893	B	MSM	Germany	2012	325000	211	II/III
361974	B	MSM	MA, USA	2011	2360000	576	I
366396	B	IDU	Germany	2013	10000000	175	II/III
383086	B	MSM	MA, USA	2012	804	861	I
394242	B	MSM	MA, USA	1998	1490000	413	II/III
395718	B	MSM	MA, USA	1997	8180000	551	I
433768	B	HSX	MA, USA	1998	22100	549	II/III
464704	B	MSM	Germany	2010	6800000	269	II/III
479693	B	MSM	MA, USA	2011	79700	477	II/III
481216	B	MSM	MA, USA	2008	1000001	310	II/III
481811	B	MSM	MA, USA	2011	570000	292	I
489910	B	MSM	MA, USA	1999	500001	383	I
494131	B	MSM	MA, USA	2002	750001	435	II/III
509452	B	MSM	MA, USA	2005	244000	240	II/III
556743	B	MSM	Germany	2010	1100000	203	II/III
571373	B	MSM	Germany	2010	698000	552	II/III
574194	B	MSM	MA, USA	2003	14600000	350	V
585067	B	MSM	Germany	2009	23300	432	II/III
587196	B	MSM	Germany	2010	6400000	552	II/III
607523	B	MSM	MA, USA	2012	2112618	227	II/III
608647	B	MSM	MA, USA	2012	49500000	522	IV
622166	C	MSM	Germany	2010	1500000	344	II/III
635056	B	MSM	Germany	2012	1000000	181	II/III
637829	B	MSM	Germany	2008	9800000	373	II/III
654207	B	MSM	Germany	2008	15000	622	II/III
678584	B	MSM	MA, USA	2012	66700	701	II/III
689801	B	MSM	MA, USA	2006	245000	595	I
701114	CRF02_AG	MSM	Germany	2009	3000000	263	II/III
702865	B	MSM	MA, USA	2008	761000	582	IV
822582	B	MSM	Germany	2008	2100000	283	II/III
848017	B	Needlestick	MA, USA	2002	475000	677	II/III
862898	B	MSM	MA, USA	2013	241777	541	V
863847	B	MSM	Germany	2010	687000	972	II/III
868558	B	MSM	MA, USA	1999	252000	546	IV
880955	B	MSM	MA, USA	2001	38200000	602	II/III
882283	B	MSM	Germany	2008	10000000	635	II/III
891439	B	MSM	MA, USA	2007	846000	314	I
891675	B	MSM	Germany	2011	123000	420	II/III
906153	B	MSM	Germany	2007	3800000	724	II/III
912218	B	MSM	Germany	2004	750100	345	II/III
923040	B	MSM	Germany	2009	3900000	283	II/III
929172	B	MSM	MA, USA	2000	547000	468	V
933384	B	MSM	MA, USA	2003	5000000	322	I
947915	B	MSM	Germany	2013	3320000	426	II/III
950965	B	MSM	MA, USA	2011	706000	395	IV
954229	B	MSM	Germany	2008	1700000	312	II/III
956306	B	MSM	Germany	2012	664000	386	II/III
963987	B	MSM	Germany	2004	2300000	448	II/III
981600	B	MSM	MA, USA	2003	123000	993	I
996401	B	HSX	MA, USA	2002	7300000	364	II/III
1006_08	B	SPD	NC, USA	1997	120000	NA	III
1012_09	B	SPD	CA, USA	1997	370000	NA	III
1018_10	B	SPD	SC, USA	1997	270000	NA	III
1051_11	B	SPD	SC, USA	1997	180000	NA	II
1053_06	B	SPD	SC, USA	1997	130000	NA	I
1059_09	B	SPD	CA, USA	1998	500000	NA	III
MSM: Men who have sex with men
IDU: Injecting drug users
HSX: Heterosexual
SPD: Source Plasma Donor: Donors who denied having sex for money, homosexual activity, intravenous drug use, or receiving a blood transfusion or a tattoo in the preceding year.
